# Supplementary material for: Selective synthesis of epichlorohydrin via liquid-phase allyl chloride epoxidation over a modified Ti-MWW zeolite in a continuous slurry bed reactor
Source: Royal Society of Chemistry journal article supplement (doi:10.1039/d0nj04491a), 2020-11-26
Supplement: d0nj04491a1.pdf [file d0nj04491a1.pdf]

## Supporting Information

for

### **Selective synthesis of epichlorohydrin *via* liquid-phase allyl chloride epoxidation over modified Ti-MWW zeolite in a continuous slurry bed reactor**

Luoyi Ding, Jinpeng Yin, Wen Tong, Rusi Peng, Jingang Jiang, Hao Xu\*, Peng Wu\*

*Shanghai Key Laboratory of Green Chemistry and Chemical Processes, School of Chemistry and Molecular Engineering, East China Normal University, North Zhongshan Road 3663, Shanghai 200062, China*

*\* Corresponding author*

*E-mail addresses: [hxu@chem.ecnu.edu.cn](mailto:hxu@chem.ecnu.edu.cn) (H. Xu), [pwu@chem.ecnu.edu.cn](mailto:pwu@chem.ecnu.edu.cn) (P. Wu).*

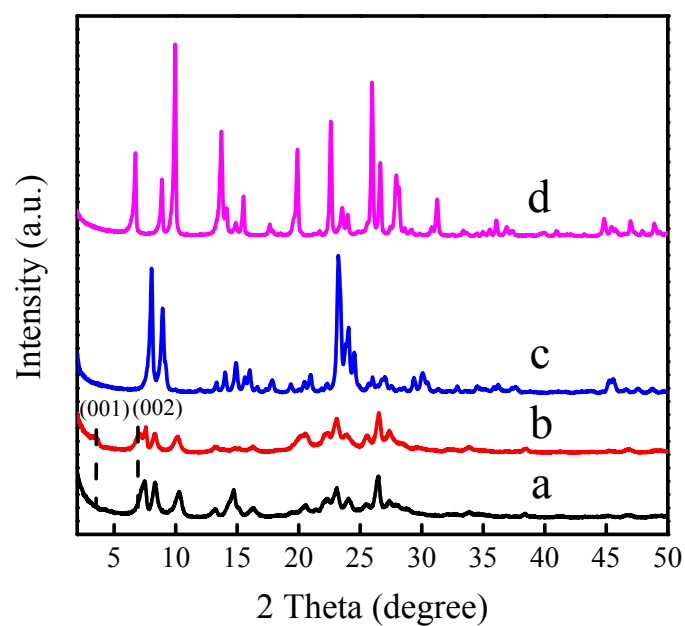

Fig. S1 XRD patterns of Ti-MWW (a), Ti-MWW-PI (b), TS-1 (c), Ti-MOR (d).

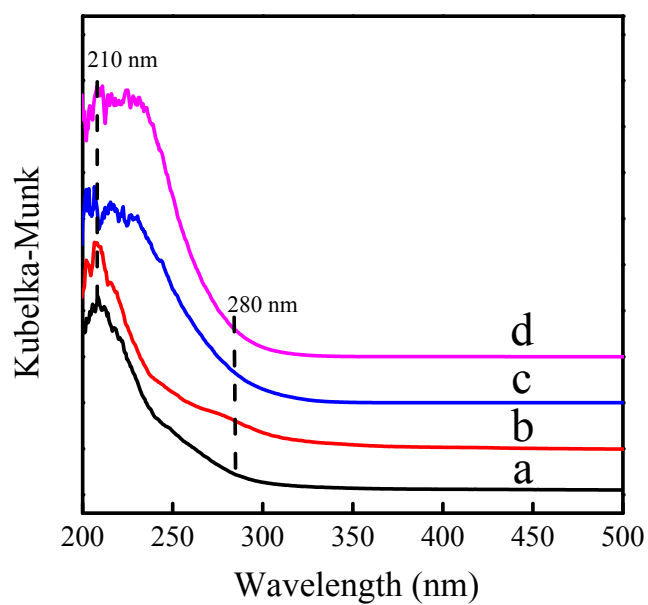

Fig. S2 UV-Vis spectra of Ti-MWW (a), Ti-MWW-PI (b), TS-1 (c), Ti-MOR (d).

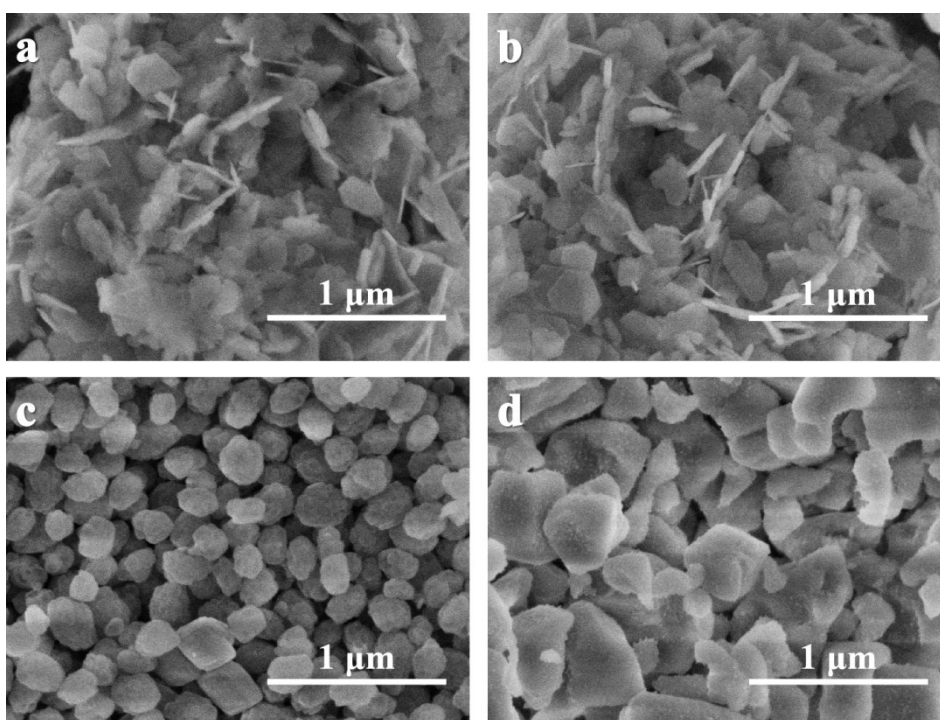

Fig. S3 Scanning electron micrograph images of Ti-MWW (a), Ti-MWW-PI (b), TS-1 (c), Ti-MOR (d).

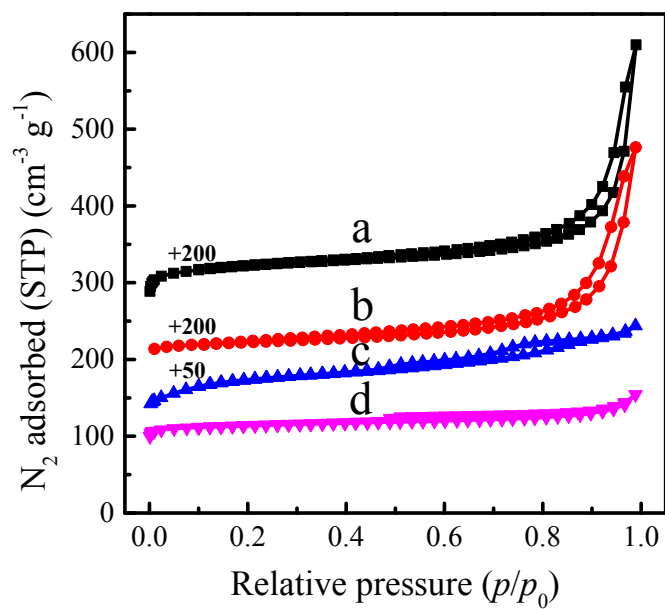

Fig. S4  $N_2$  adsorption-desorption isotherms of Ti-MWW (a), Ti-MWW-PI (b), TS-1 (c) and Ti-MOR (d).

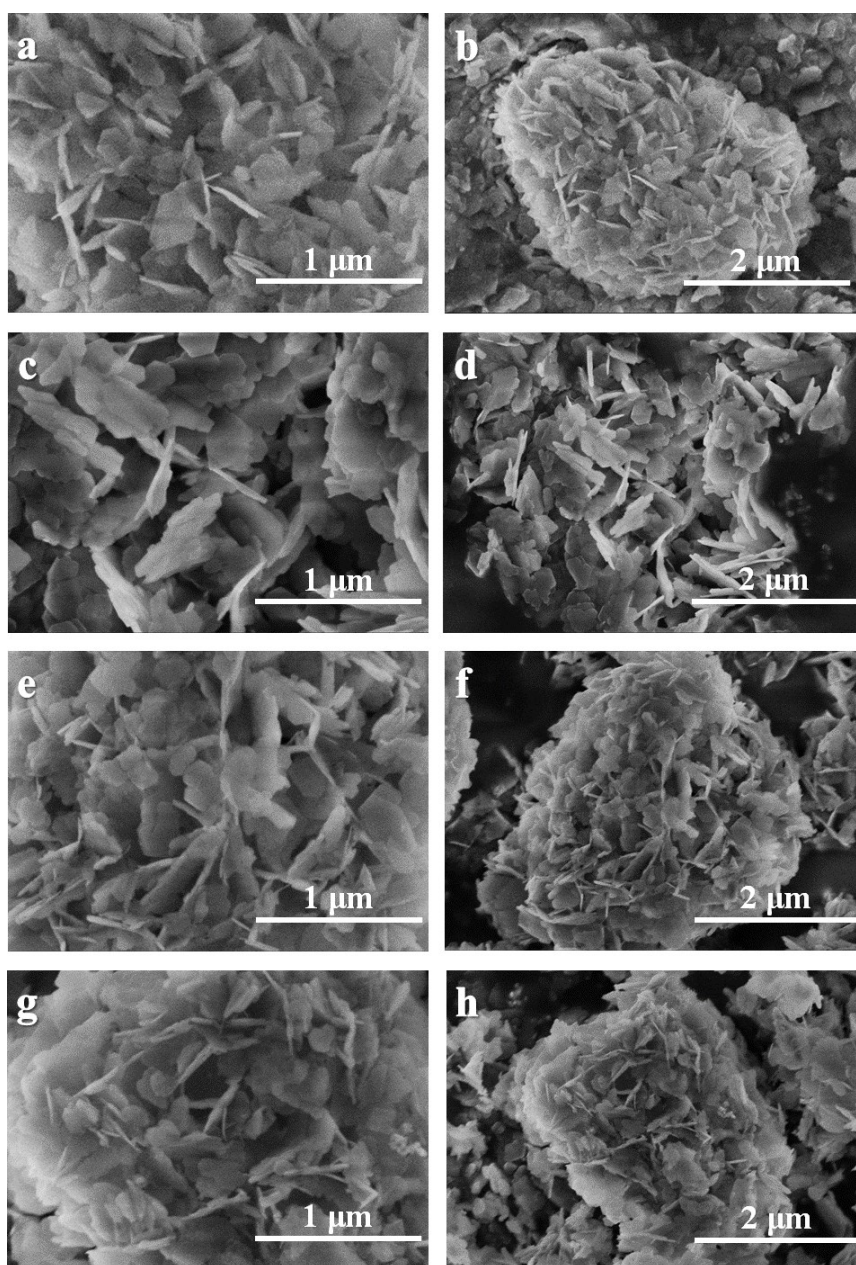

Fig. S5 Scanning electron micrograph images of Ti-MWW (a, b), fresh Ti-MWW-PI (c, d), deactivated Ti-MWW-PI (e, f) and regenerated Ti-MWW-PI (g, h).

Table S1 The physicochemical properties of various titanosilicates

| Catalyst  | Structure code | Crystal size <sup>a</sup> (μm) | Si/Ti <sup>b</sup> | SSA <sup>c</sup> (m <sup>2</sup> g <sup>-1</sup> ) | Pore volume (cm <sup>3</sup> g <sup>-1</sup> ) |                     |
|-----------|----------------|--------------------------------|--------------------|----------------------------------------------------|------------------------------------------------|---------------------|
|           |                |                                |                    |                                                    | total <sup>d</sup>                             | micro. <sup>e</sup> |
| Ti-MWW    | MWW            | 0.6 × 0.6 × 0.1                | 39                 | 461                                                | 0.636                                          | 0.152               |
| Ti-MWW-PI | MWW            | 0.6 × 0.6 × 0.1                | 39                 | 79                                                 | 0.427                                          | 0.010               |
| TS-1      | MFI            | 0.2 - 0.4                      | 45                 | 450                                                | 0.300                                          | 0.146               |
| Ti-MOR    | MOR            | 0.2 - 0.5                      | 54                 | 440                                                | 0.239                                          | 0.159               |

<sup>a</sup> Obtained by SEM

<sup>b</sup> Determined by ICP analysis

<sup>c</sup> SSA: specific surface area, determined by N<sub>2</sub> adsorption isotherms

<sup>d</sup> Total Pore volume, given by N<sub>2</sub> adsorption at  $p/p_0 = 0.99$

<sup>e</sup> Micropore volume given by  $t$ -plot method

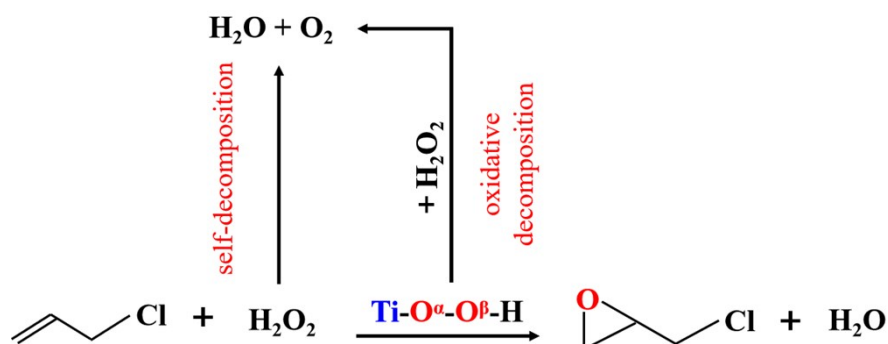

Scheme S1 The proposed reaction pathways of the hydrogen peroxide in the epoxidation of ALC.

*The non-productive decomposition reactions of H<sub>2</sub>O<sub>2</sub> included the H<sub>2</sub>O<sub>2</sub> self-decomposition and the oxidative decomposition of H<sub>2</sub>O<sub>2</sub> with the Ti-O<sup>α</sup>-O<sup>β</sup>-H intermediate species. The invalid decomposition of H<sub>2</sub>O<sub>2</sub> and the consuming of H<sub>2</sub>O<sub>2</sub> in ALC epoxidation were competitive.*

Table S2 The catalytic performance of selective poisoned Ti-MWW-PI in ALC epoxidation<sup>a</sup>

| Catalyst  | Poisoning reagent | ALC conv. (%) | ECH sel. (%) | H <sub>2</sub> O <sub>2</sub> (%) |      |
|-----------|-------------------|---------------|--------------|-----------------------------------|------|
|           |                   |               |              | conv.                             | eff. |
| Ti-MWW-PI | None              | 90.0          | 99.8         | 92.0                              | 97.8 |
|           | TPA               | 1.6           | 73.8         | 29.8                              | 5.4  |
|           | TPhA              | 88.8          | 99.7         | 93.1                              | 95.4 |

<sup>a</sup> Reaction conditions: catalyst, 0.05 g; allyl chloride, 10 mmol; H<sub>2</sub>O<sub>2</sub> (30 wt. %), 10 mmol; TBA, 5 mL; TPA (tripropylamine), 2 mmol; TPhA (triphenylamine), 2 mmol; temp., 333 K; time, 1 h

*The selective poisoning experiment was conducted over Ti-MWW-PI, so as to determine where the allyl chloride (ALC) epoxidation occurred. The poisoning reagent tripropylamine (TPA) with small molecule size was able to reach all the Ti sites, while the bulky triphenylamine (TPhA) hardly entered into the 10-membered ring (MR) channels and thus selectively poisoned the Ti sites within the 12-MR side cups on the external surface. The amount of amine (2 mmol) was sufficient to poison the accessible Ti sites according to the Ti amount (0.02 mmol) in the added catalyst. As shown in Table S2, the ALC and H<sub>2</sub>O<sub>2</sub> conversion were decreased from 90.0% and 92.0% to 1.6% and 29.8% when TPA was added, while the bulky TPhA had little impact on the catalytic performance. This indicated that most of Ti species located at the external 12-MR side cups did not involve in the catalytic reaction, and the ALC epoxidation mainly occurred in the intralayer 10-MR channels.*

Table S3 The reaction results of ALC epoxidation over Ti-MWW with piperidine addition<sup>a</sup>

| Catalyst | piperidine | ALC conv. (%) | ECH sel. (%) | H <sub>2</sub> O <sub>2</sub> (%) |      |
|----------|------------|---------------|--------------|-----------------------------------|------|
|          |            |               |              | conv.                             | eff. |
| Ti-MWW   | No         | 71.8          | 99.0         | 79.6                              | 90.2 |
|          | Yes        | 11.7          | 98.8         | 30.2                              | 38.7 |

<sup>a</sup> Reaction conditions: catalyst, 0.05 g; allyl chloride, 10 mmol; H<sub>2</sub>O<sub>2</sub> (30 wt. %), 10 mmol; TBA, 5 mL; piperidine, 0.1 mmol; temp., 333 K; time, 1 h
